# Supplementary material for: Effects of access resistance on the resistive-pulse caused by translocating of a nanoparticle through a nanopore
Source: Royal Society of Chemistry journal article supplement (doi:10.1039/c3ra46032k), 2014-01-01
Supplement: c3ra46032k.pdf [file c3ra46032k.pdf]

with the boundary conditions

$$\text{Inlet (AB): } \Phi = 1 \quad (\text{R2})$$

$$\text{Outlet (GH): } \Phi = 0 \quad (\text{R3})$$

$$\text{All walls: } \mathbf{n} \cdot \nabla \Phi = 0 \quad (\text{R4})$$

where  $\mathbf{n}$  is the unit outer normal vector.

In our simulations, the reservoirs are assumed to be infinite. A nanopore system with lower thickness-to-diameter aspect ratios ( $L/D$ ) has larger reservoirs in our computation. Fig. S2 shows the variation of the resistive-pulse amplitude as a function of the scaled reservoirs length ( $L_R/D$ ) for the nanopore system with  $D = 5L$ .

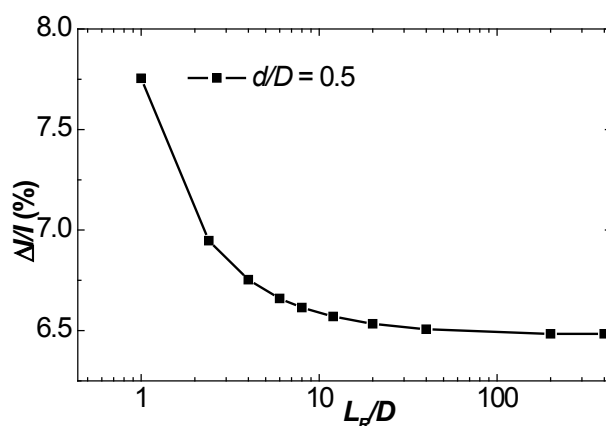

Fig. S2. The resistive-pulse amplitude varies as a function of the scaled reservoirs length ( $L_R/D$ ) for nanopore system with  $D = 5L$ .

A typical reservoir size for our computation of the  $D = 5L = 250$  nm nanopore system is  $L_R = 5 \mu\text{m}$  and  $H_R = 10 \mu\text{m}$ . Since the two reservoirs are assumed to be infinitely large, for a given particle-nanopore system with the same  $L/D$  and  $d/D$  ratios, we will always get the same  $\Delta I/I$ .

## 1.2 The PNP-NS model

The nanoparticle translational velocity,  $\mathbf{u}_p = U_p \mathbf{e}_z$ , is an important parameter for boundary conditions of the PNP-NS model. However, it is unknown a priori and needs to be calculated by satisfying the  $z$  component force balance on the particle:<sup>1,2</sup>

$$F_E + F_D = 0 \quad (\text{R5})$$

Here,  $F_E$  and  $F_D$  are, respectively, the electrostatic and hydrodynamic drag

forces in the  $z$  direction:

$$F_E = \iint_S \sigma_p \cdot (-\partial\phi / \partial z) dS \quad (\text{R6})$$

and

$$F_D = -\iint_S [\mu(\partial u_z / \partial r + \partial u_r / \partial z) \cdot n_r + (2\mu\partial u_z / \partial z - p) \cdot n_z] dS \quad (\text{R7})$$

where  $S$  is the surface of the particle, and  $n_r$  and  $n_z$  are, respectively, the  $r$  and  $z$  components of the unit vector  $\mathbf{n}$ .

The solution process for the particle's velocity is as follows: (i) calculate the PNP-NS equations with an initial value (e.g.,  $U_p = 0$ ) of the particle's velocity; (ii) update  $U_p$  using the Newton–Raphson method until the total forces were balanced. Usually, it takes less than five iterative steps for convergence.

In this study, we consider KCl aqueous solution filled in the nanopore system. The relative permittivity of KCl aqueous solution is  $\epsilon_r = 80$ , the diffusivities of  $\text{K}^+$  and  $\text{Cl}^-$ ,  $D_{\text{K}^+}$  and  $D_{\text{Cl}^-}$ , are  $1.957 \times 10^{-9} \text{ m}^2/\text{s}$  and  $2.032 \times 10^{-9} \text{ m}^2/\text{s}$ , respectively, the fluid density is  $\rho = 1000 \text{ kg/m}^3$ ; the fluid viscosity is  $\mu = 1 \times 10^{-3} \text{ Pa}\cdot\text{s}$ , the temperature is  $T = 300 \text{ K}$ , and the applied voltage is  $\phi_0 = 0.1 \text{ V}$ .

## 2. Numerical results for other uncharged nanopore systems

Besides the two typical nanopore system with  $D = L$  and  $D = 5L$  in the text, we have also calculated various nanopore systems with  $D/L$  ranging from 0.1 to 10. Fig. S3 displays comparisons of the numerical results with different analytic predictions on resistive-pulse amplitude caused by a particle ( $d/D = 0.5$ ) in other nanopore systems. Here, our analytical model for nanopore system with  $D \leq L$  is the eqn (13) and eqn (14) with  $\beta = 0.5$ , and for nanopore system with  $D > L$  is the eqn (15) and eqn (14) with  $\beta = 0.8$ . It can be found that our analytical model agrees very well with numerical results for nanopore systems with  $D \leq L$ . And for nanopore systems with  $D > L$ , our analytical model provides better agreement with the numerical results than other models for particles with  $d/D \geq 0.4$ .

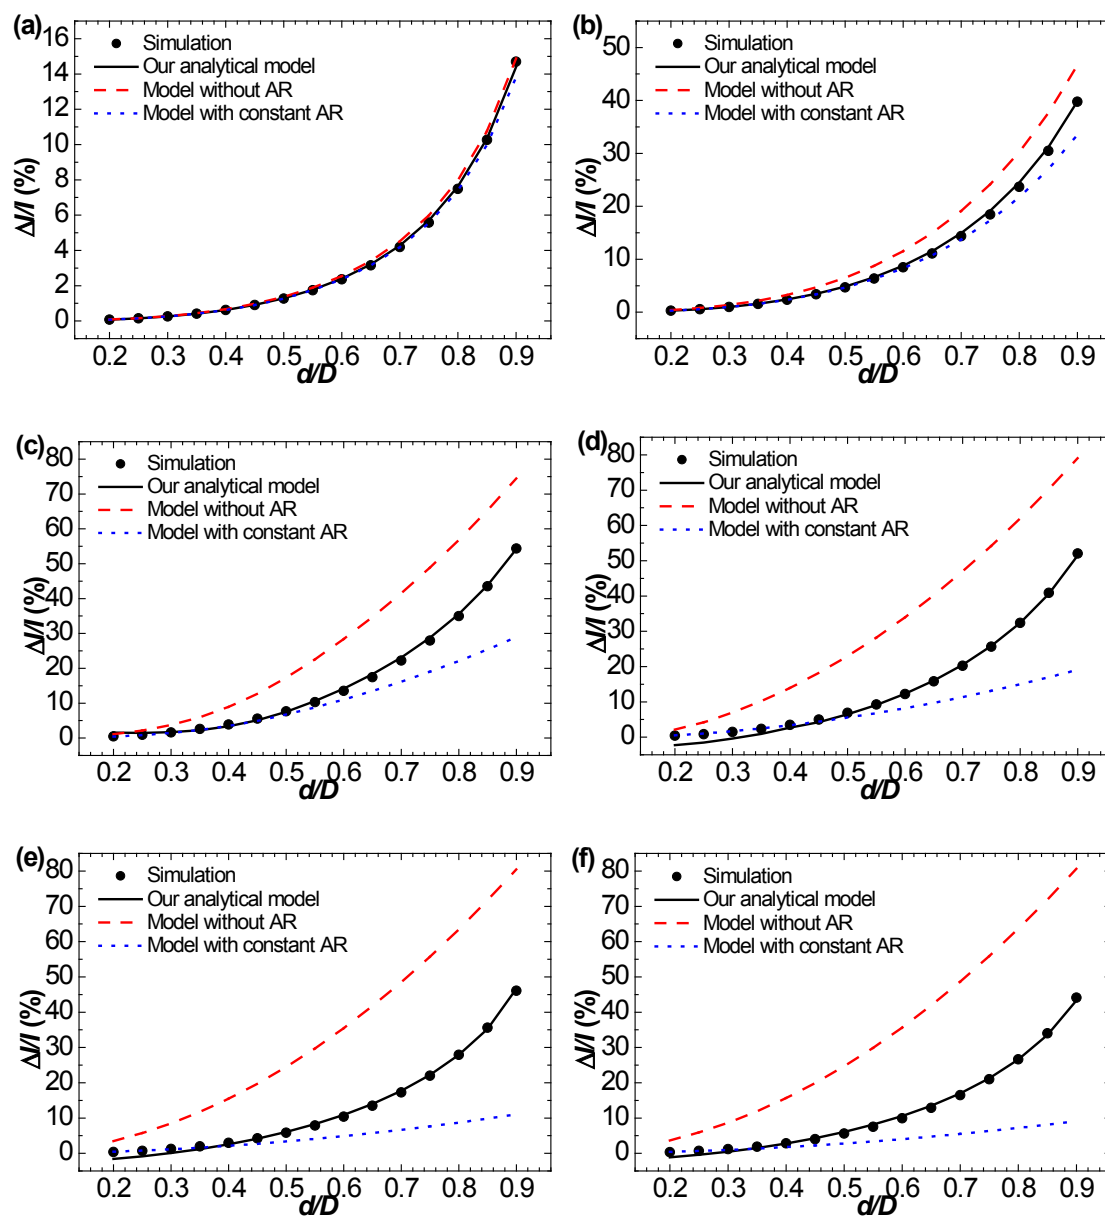

Fig. S3. Comparisons of the numerical results and different analytic predictions on resistive-pulse amplitude caused by a particle with different sizes in a nanopore system with (a)  $D/L = 0.1$  (b)  $D/L = 0.5$  (c)  $D/L = 2$  (d)  $D/L = 4$  (e)  $D/L = 8$  (f)  $D/L = 10$ . Our analytical model in (a) and (b) is eqn (13) and eqn (14) with  $\beta = 0.5$ , and in (c)~(f) is eqn (15) and eqn (14) with  $\beta = 0.8$ .

1. S. Qian, A. Wang and J. K. Afonien, *Journal of Colloid and Interface Science*, 2006, **303**, 579-592.
2. L. H. Yeh, M. K. Zhang, S. Z. Qian and J. P. Hsu, *Nanoscale*, 2012, **4**, 2685-2693.
